# Supplementary material
Source: PubMed Central journal article supplement (PMC4152004)
Supplement: NIHMS623560-supplement-Suppl__Figure_1.pdf [file NIHMS623560-supplement-Suppl__Figure_1.pdf]

**A**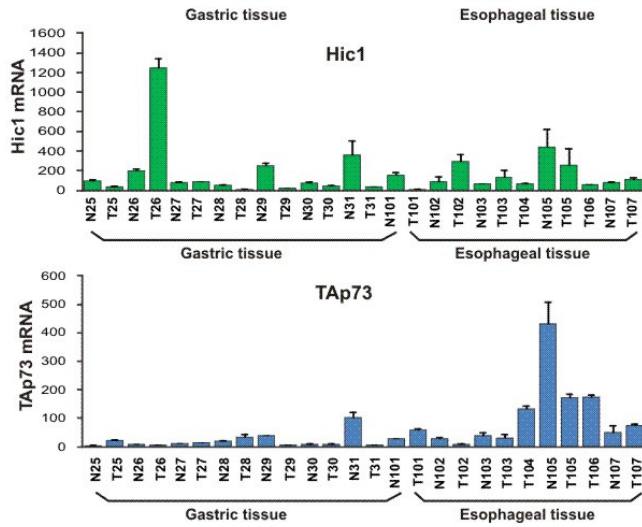**B**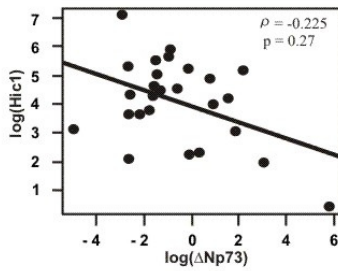**C**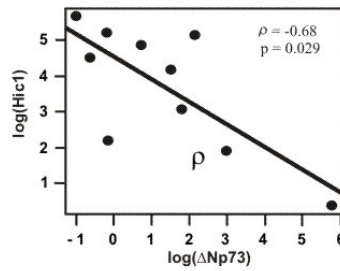**D**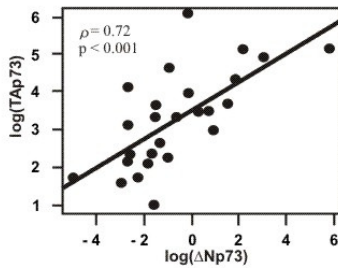

**Supplementary Figure 1. Spearman's correlation analyses between  $\Delta$ Np73 mRNA and Hic1 mRNA and TAp73 mRNA in gastric and esophageal tumors.**

**A.** Expression analyses of Hic1 and TAp73 transcripts in 26 gastric and esophageal normal and tumor tissues. Data are normalized to HPRT1 mRNA.

**B.** Scatter plot shows correlation between  $\Delta$ Np73 and Hic1 mRNA in the combined set of 26 gastric and esophageal normal and tumor tissues.

**C.** The same as (B) but 11 esophageal specimens were analyzed.

**D.** Scatter plot of association between  $\Delta$ Np73 and TAp73 expression.
