# Supplementary material
Source: PubMed Central journal article supplement (PMC4152004)
Supplement: NIHMS623560-supplement-Suppl__Table_1.pdf [file NIHMS623560-supplement-Suppl__Table_1.pdf]

**Supplementary Table 1.** Comparison between  $\Delta$ Np73 expression and patient's survival.

| Type of cancer                   | Nuclear staining |           |         | Cytoplasmic staining |           |         |
|----------------------------------|------------------|-----------|---------|----------------------|-----------|---------|
|                                  | HR               | 95% CI    | p-value | HR                   | 95% CI    | p-value |
| Gastric cancer (N=117)           | 2.59             | 1.3-5.17  | 0.005*  | 2.30                 | 1.21-4.38 | 0.009*  |
| Esophageal and GEJ cancer (N=68) | 1.03             | 0.66-1.63 | 0.897   | 2.21                 | 0.95-5.17 | 0.051   |

\* The difference was considered significant if  $p < .05$ .
