# Supplementary material
Source: PubMed Central journal article supplement (PMC4152004)
Supplement: NIHMS623560-supplement-Suppl__Table_2.pdf [file NIHMS623560-supplement-Suppl__Table_2.pdf]

**Supplementary table 2.**

Comparison between  $\Delta$ Np73 expression and clinicopathological variables in gastric tumors.

| Variable (Case number, Total N=117) | Nuclear staining         |         | Cytoplasmic staining     |         |
|-------------------------------------|--------------------------|---------|--------------------------|---------|
|                                     | $\Delta$ Np73 positivity | P-value | $\Delta$ Np73 positivity | P-value |
| Sex                                 |                          | 0.48    |                          | 0.32    |
| Male (N=65)                         | 14                       |         | 18                       |         |
| Female (N=52)                       | 8                        |         | 19                       |         |
| Location of tumor                   |                          | 0.75    |                          | 0.62    |
| Antrum (N=45)                       | 7                        |         | 11                       |         |
| Body (N=34)                         | 5                        |         | 13                       |         |
| Cardia (N=21)                       | 5                        |         | 7                        |         |
| Fundus (N=6)                        | 2                        |         | 3                        |         |
| Diffuse (N=5)                       | 1                        |         | 2                        |         |
| Unknown (N=6)                       | 2                        |         | 1                        |         |
| Lauren classification               |                          | 0.76    |                          | 0.21    |
| Intestinal (N=45)                   | 8                        |         | 18                       |         |
| Diffuse (N=70)                      | 14                       |         | 19                       |         |
| Mixed (N=2)                         | 0                        |         | 0                        |         |
| WHO classification                  |                          | 0.83    |                          | 0.2     |
| Well differentiated (N=10)          | 2                        |         | 6                        |         |
| Moderately differentiated (N=36)    | 6                        |         | 12                       |         |
| Poorly differentiated (N=61)        | 13                       |         | 16                       |         |
| Undifferentiated (N=10)             | 1                        |         | 3                        |         |
| pT classification                   |                          | 0.05    |                          | 0.04*   |
| Tis (N=1)                           | 1                        |         | 0                        |         |
| T1 (N=18)                           | 2                        |         | 6                        |         |
| T2 (N=41)                           | 9                        |         | 8                        |         |
| T3 (N=47)                           | 6                        |         | 16                       |         |
| T4 (N=10)                           | 4                        |         | 7                        |         |
| Invasiveness                        |                          | 0.5     |                          | 0.61    |
| Early cancer (N=19)                 | 3                        |         | 6                        |         |
| Advanced cancer (N=98)              | 19                       |         | 31                       |         |
| Lymph node metastasis               |                          | 0.8     |                          | 0.53    |
| Positive (N=78)                     | 14                       |         | 25                       |         |
| Negative (N=39)                     | 8                        |         | 12                       |         |

\* The difference was considered significant if  $p < .05$ .
