# Supplementary material
Source: PubMed Central journal article supplement (PMC4152004)
Supplement: NIHMS623560-supplement-Suppl__Table_3.pdf [file NIHMS623560-supplement-Suppl__Table_3.pdf]

**Supplementary table 3.**

Comparison between  $\Delta$ Np73 expression and clinicopathological variables in esophageal and GEJ tumors.

| Variable (Case number, Total N=68)    | Nuclear staining         |         | Cytoplasmic staining     |         |
|---------------------------------------|--------------------------|---------|--------------------------|---------|
|                                       | $\Delta$ Np73 positivity | P-value | $\Delta$ Np73 positivity | P-value |
| Sex                                   |                          | 0.67    |                          | 0.39    |
| Male (N=62)                           | 19                       |         | 54                       |         |
| Female (N=5)                          | 1                        |         | 5                        |         |
| Missing (N=1)                         |                          |         |                          |         |
| Location of tumor                     |                          | 0.76    |                          | 0.20    |
| Esophagus (N=22)                      | 7                        |         | 21                       |         |
| GEJ (N=46)                            | 13                       |         | 39                       |         |
| Tumor grade (differentiation)         |                          | 0.29    |                          | 0.07    |
| Well differentiated (N=5)             | 1                        |         | 5                        |         |
| Moderately differentiated (N=29)      | 6                        |         | 27                       |         |
| Moderately-poor differentiated (N=12) | 4                        |         | 10                       |         |
| Poorly differentiated (N=18)          | 6                        |         | 14                       |         |
| Missing (N=4)                         |                          |         |                          |         |
| pT classification                     |                          | 0.31    |                          | 0.59    |
| T1 (N=17)                             | 7                        |         | 15                       |         |
| T2 (N=17)                             | 4                        |         | 15                       |         |
| T3 (N=27)                             | 5                        |         | 25                       |         |
| T4 (N=5)                              | 2                        |         | 3                        |         |
| Missing (N=2)                         |                          |         |                          |         |
| Lymph node metastasis                 |                          | 0.79    |                          | 0.04*   |
| Positive (N=27)                       | 7                        |         | 21                       |         |
| Negative (N=38)                       | 11                       |         | 36                       |         |
| Missing (N=3)                         |                          |         |                          |         |

\* The difference was considered significant if  $p < .05$ .
