# Supplementary material
Source: PubMed Central journal article supplement (PMC4152004)
Supplement: NIHMS623560-supplement-Suppl__Table_4.pdf [file NIHMS623560-supplement-Suppl__Table_4.pdf]

**Supplementary table 4.** Sequences of Primers for Quantitative Real-Time PCR and ChIP assay.

Real-Time PCR primers:

| Name                                                        | Primer sequence                               |
|-------------------------------------------------------------|-----------------------------------------------|
| $\Delta$ Np73 (set 1, for real-time PCR in primary tumors ) | CAAACGGCCCCGCATGTTCCC, TGGTCCATGGTGCTGCTCAGC  |
| $\Delta$ Np73 (set 2, for other analyses <i>in vitro</i> )  | AAACGGCCCCGCATGTTCCCC, CGCGGCTGCTCATCTGGTCC   |
| Hic1                                                        | CGACGACTACAAGAGCAGCAGC, CAGGTTGTCACCGAAGCTCTC |
| HPRT1                                                       | TTGGAAAGGGTGTTTATTCCTCA, TCCAGCAGGTCAGCAAAGAA |

ChIP primers:

| Name       | Primer sequence                            |
|------------|--------------------------------------------|
| Specific   | CCTCCCCACGCAGCCTCCTT, GAGGCATGGATCTGGGCGGC |
| Unspecific | CTGCACTCCAGGCGGACAGC, GTCTCCCCAACGCCAGGTGC |
